# Supplementary material
Source: PubMed Central journal article supplement (PMC5426380)
Supplement: jix071_suppl_Supplementary_Table_S1.pdf [file jix071_suppl_Supplementary_Table_S1.pdf]

**Supplemental Table 1.** Genetic characteristics of anti-LukAB antibodies

| mAb   | Isotype | EC <sub>50</sub> <sup>1</sup><br>(µg/mL) | Heavy chain |        |         |                 |      |      |                      |              |              |           | Light chain |                 |      |      |                   |              |              |
|-------|---------|------------------------------------------|-------------|--------|---------|-----------------|------|------|----------------------|--------------|--------------|-----------|-------------|-----------------|------|------|-------------------|--------------|--------------|
|       |         |                                          | V gene      | J gene | D gene  | Number of AA in |      |      | HCDR3 AA sequence    | Nt mutations | AA mutations | V gene    | J gene      | Number of AA in |      |      | LCDR3 AA sequence | Nt mutations | AA mutations |
|       |         |                                          |             |        |         | CDR1            | CDR2 | CDR3 |                      |              |              |           |             | CDR1            | CDR2 | CDR3 |                   |              |              |
| SA-13 | IgG2, λ | 0.8                                      | 3-11*01     | 3*02   | 2-15*01 | 8               | 8    | 17   | CARDGVGGPRARYDAFDIW  | 19           | 11           | #         |             |                 |      |      |                   |              |              |
| SA-15 | IgG1, κ | 1.5                                      | 3-30*03     | 3*02   | 6-13*01 | 8               | 8    | 14   | CVKVGWTLVGDGVDMMW    | 27           | 20           | KV1-27*01 | KJ3*01      | 6               | 3    | 9    | CQKYNGAPPTF       | 19           | 8            |
| SA-17 | IgG1, λ | 0.3                                      | 3-43D*01    | 1*01   | 5-18*01 | 8               | 8    | 18   | CARDIKIGEAVMITVPGQHW | 23           | 17           | KV1-39*01 | KJ2*01      | 6               | 3    | 9    | CQESSNTPPTF       | 16           | 11           |
| SA-22 | IgG1, κ | --                                       | V3-53*01    | 4*02   | 4-17*01 | 8               | 7    | 12   | CAREDSVDGYFDYW       | 22           | 13           | LV3-19*01 | LJ2*01      | 6               | 3    | 11   | CNSRDSSGNHVVF     | 15           | 12           |

SA-13 was obtained from acute sample, while SA-15 and SA-17 were obtained from the convalescent sample.

<sup>1</sup>EC50 values were obtained in ELISA with LukAB as the antigen. SA-22 was obtained from the same patient, but recognizes IsdA, another *S. aureus* protein.

# We were not able to obtain the sequence of variable domain of the light chain.

Nt = nucleotide; AA = amino acid; CDR = Complementarity Determining Region
